# Supplementary material for: A robust spring-like lamellar VO/C nanostructure for high-rate and long-life potassium-ion batteries
Source: Royal Society of Chemistry journal article supplement (doi:10.1039/d0ta08845e), 2020-01-01
Supplement: d0ta08845e1.pdf [file d0ta08845e1.pdf]

## Supporting Information

# Robust spring-like lamellar VO/C nanostructure for high-rate and long-life potassium-ion batteries

Jian Lu,<sup>‡a</sup> Changlai Wang,<sup>‡ab</sup> Guoliang Xia,<sup>a</sup> Huigang Tong,<sup>a</sup> Yang Yang,<sup>a</sup> Dequan Zhu,<sup>d</sup> and Qianwang Chen<sup>\*ac</sup>

<sup>a</sup> Hefei National Laboratory for Physical Science at Microscale, Department of Materials Science and Engineering, University of Science and Technology of China, Hefei, Anhui 230026, P. R. China

<sup>b</sup> Center of Super-Diamond and Advanced Films (COSDAF), Department of Materials Science and Engineering, City University of Hong Kong, Tat Chee Avenue, Kowloon, Hong Kong, P. R. China.

<sup>c</sup> High Magnetic Field Laboratory, Hefei Institutes of Physical Science, Chinese Academy of Sciences, Hefei, Anhui 230031, P. R. China

<sup>d</sup> School of Electronic Engineering and Intelligent Manufacturing, Anqing Normal University, Anqing, Anhui 246052, P. R. China

<sup>‡</sup> These authors contributed equally to this work.

\* Corresponding Author, E-mail: cqw@ustc.edu.cn

## Experimental Section

**Synthesis of V-NDC.** The V-NDC MOF precursor was prepared with a modified hydrothermal method.<sup>[1]</sup>

In a typical synthesis, 3 mmol anhydrous vanadium trichloride ( $\text{VCl}_3$ ) and 1.5 mmol 1,4-naphthalenedicarboxylic acid ( $\text{H}_2\text{NDC}$ ) were dissolved in 30 mL  $\text{H}_2\text{O}$  and vigorously stirred for 1 h at room temperature. The mixed solution was then transferred into a Teflon-lined stainless steel autoclave (40 mL) and heated at 180 °C for 24 h. The earth-yellow powder was collected by centrifugation and washed with water and ethanol for three times each, and dried under vacuum overnight.

**Synthesis of VO/C.** The as-synthesized V-NDC precursor was placed in a quartz boat and annealed under inert atmosphere at 600 °C for 3 h to obtain the VO/C composite. The amorphous carbon was prepared by washing the VO/C composite with 3 M  $\text{HNO}_3$  and dried under vacuum overnight.

**Synthesis of KPB.** The Prussian blue analogue  $\text{KFe}[\text{Fe}(\text{CN})_6]$  (denoted as KPB) was synthesized by a coprecipitation method according to a previous literature.<sup>[2]</sup>

**Characterization.** The morphology of the samples was characterized by scanning electron microscope (JEOL JSM-6700M and GeminiSEM 500). The powder XRD patterns were recorded with a Japan Rigaku D/MAX- $\gamma$ A X-ray diffractometer using  $\text{Cu-K}\alpha$  radiation. TEM images were acquired on a Hitachi H-7650 transmission electron microscope with an accelerating voltage of 100kV. The high-angle annular dark field scanning transmission electron microscopy (HAADF-STEM) and energy-dispersive X-ray (EDX) analyses were performed on a JEOL ARM-200F field-emission transmission electron microscope operating at 200 kV accelerating voltage. Raman spectra were collected on a LabRAM HR Raman spectrometer. TGA was carried out with a SDT Q600 (V20.9 Build 20) thermal analyzer system. XPS was conducted on a Thermo ESCALAB 250Xi X-ray photoelectron spectrometer instrument. The specific surface area was measured with the Brunauer-Emmett-Teller (BET) method using a Quantachrome

Instruments (version 4.01), while the pore volume and pore size were calculated according to the Barrett–Joyner–Halenda (BJH) formula applied to the adsorption branch.

**Electrochemical measurements.** The electrochemical performance was evaluated with CR2032 coin-type cells. The working electrode was prepared by mixing active materials (70 wt.%), acetylene black (20 wt.%) and polyvinylidene difluoride (10 wt.%) in N-methyl-2-pyrrolidone. Then the mixture was brush-coated on copper foil and dried under vacuum at 60 °C for 12 h. The mass loading of the working electrode was 0.7-0.8 mg cm<sup>-2</sup>. Potassium metal was used as the counter/reference electrode and glass fiber (Whatman, GF/D) was used as the separator. The electrolyte was 1 M KFSI dissolved in a 1:1 (v:v) mixture of ethylene carbonate and diethyl carbonate. The cathode was fabricated in the same way on aluminum foil. The cathode-to-anode mass loading ratio was about 3:1. The cells were assembled in an argon-filled glovebox with both the moisture and the oxygen contents below 0.1 ppm. Galvanostatic charge/discharge measurements were performed on a battery test system (Neware CT-3008W) in a voltage range of 0.01-3.0 V (vs K<sup>+</sup>/K) at room temperature. The cyclic voltammograms (CV) and electrochemical impedance spectroscopy (EIS) were tested on a CHI760E electrochemical workstation.

**Computational methods.** The calculations in this study were performed using density functional theory (DFT) as implemented in Vienna ab initio simulation package (VASP).<sup>[3]</sup> The projector augmented wave (PAW) method was applied to describe the interaction of electrons with the ionic cores.<sup>[4]</sup> Electron exchange-correlation was represented by the functional of Perdew, Burke and Ernzerhof (PBE) of generalized gradient approximation (GGA).<sup>[5]</sup> For all calculations, the cutoff of the energy for plane-wave basis was set to 400 eV. All structures were optimized with a convergence criterion of 1×10<sup>-5</sup> eV for the energy and 0.01 eV/Å for the forces. Brillouin zone sampling was employed using a Monkhorst-Packing

grid with  $3 \times 3 \times 1$ . And  $5 \times 5 \times 1$  K-point grid was used to calculate the density of states (DOS). The climbing-image nudged elastic band (CI-NEB) method was used to study the diffusion barrier of K ions.<sup>[6]</sup>

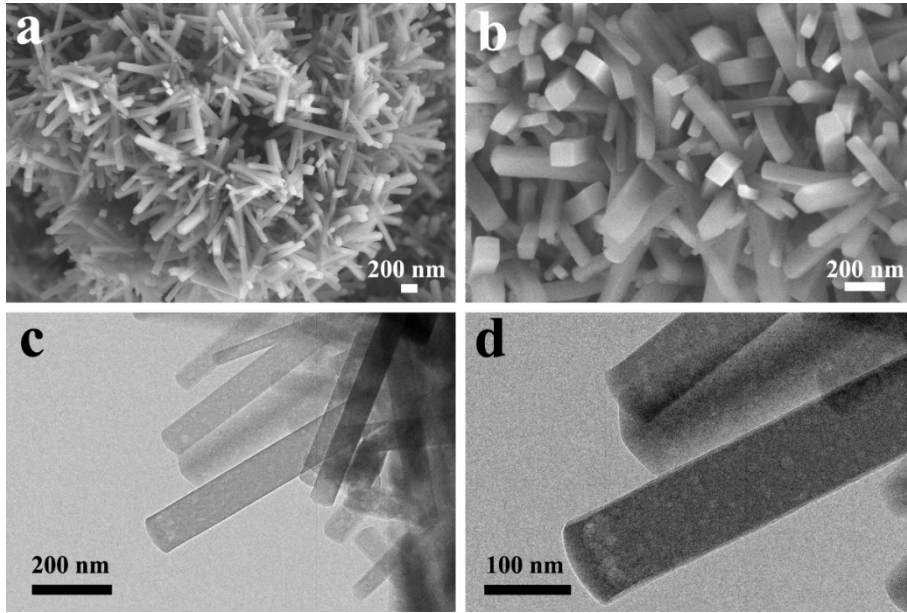

**Fig. S1.** (a, b) SEM and (c, d) TEM images of the as-synthesized V-NDC precursor.

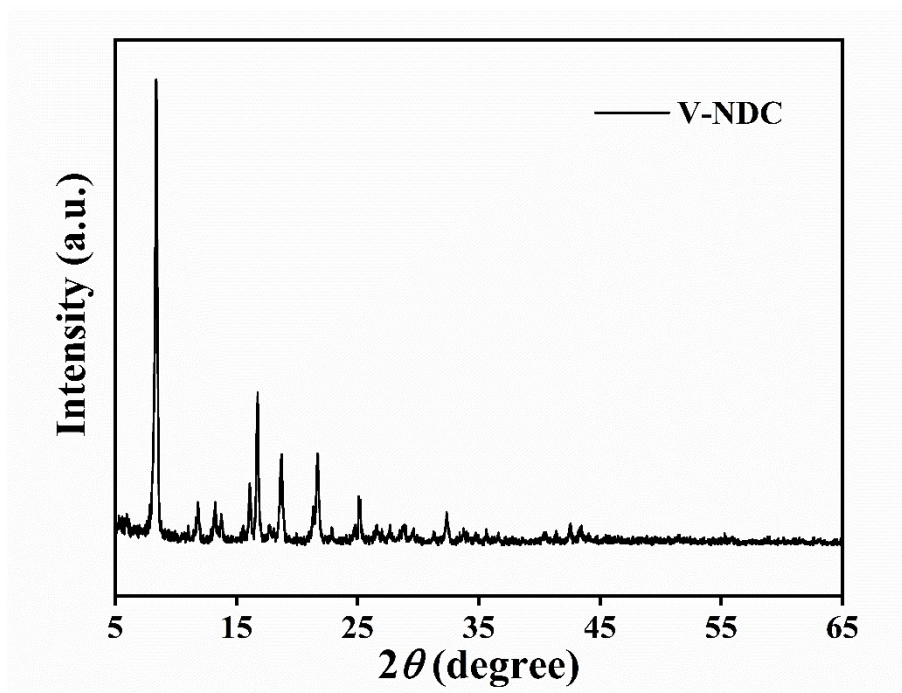

**Fig. S2.** XRD pattern of the as-synthesized V-NDC precursor.

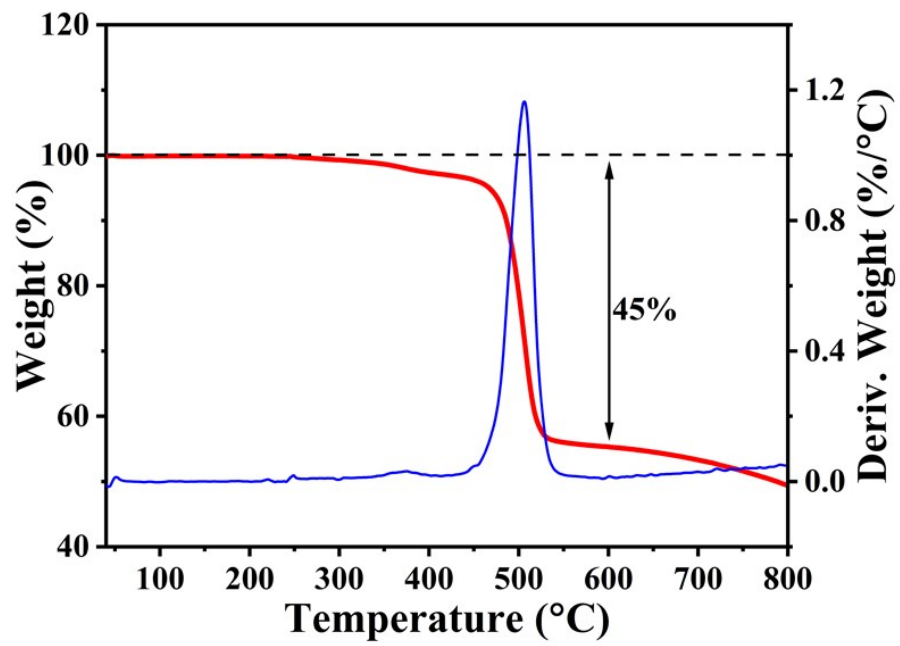

**Fig. S3.** TGA curve of the V-NDC precursor under inert atmosphere.

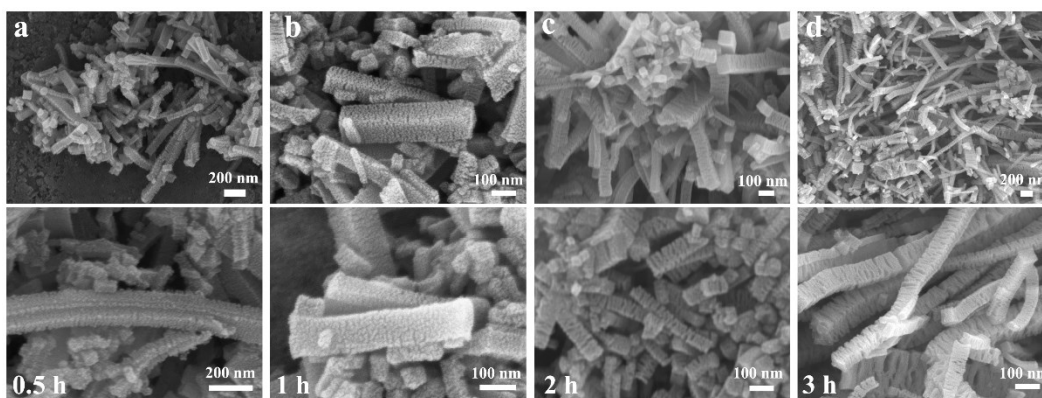

**Fig. S4.** Characterizations of the structural evolution of the V-NDC precursor after different time during the annealing process. (a) 0.5h; (b) 1h; (c) 2h; (d) 3h.



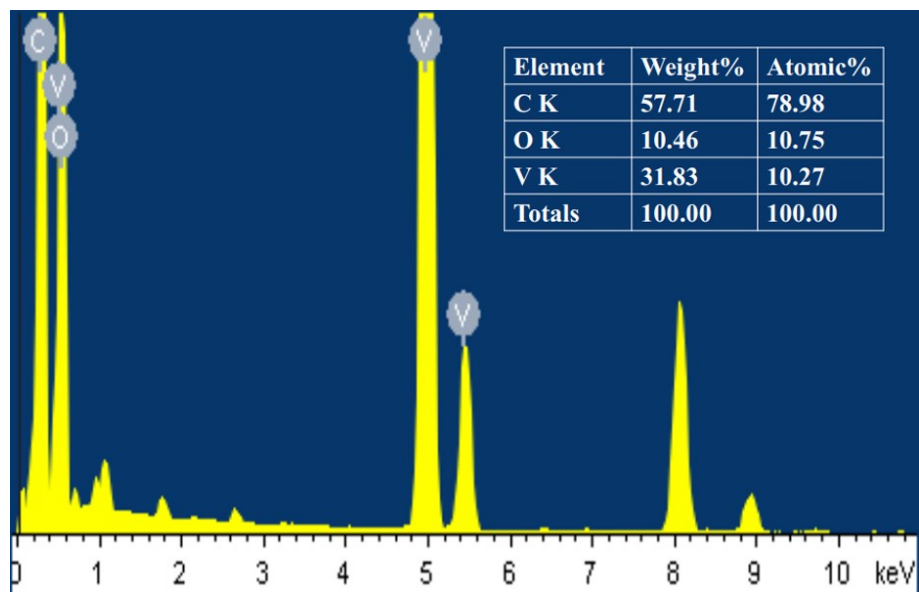

**Fig. S5.** EDS elemental analysis of VO/C.

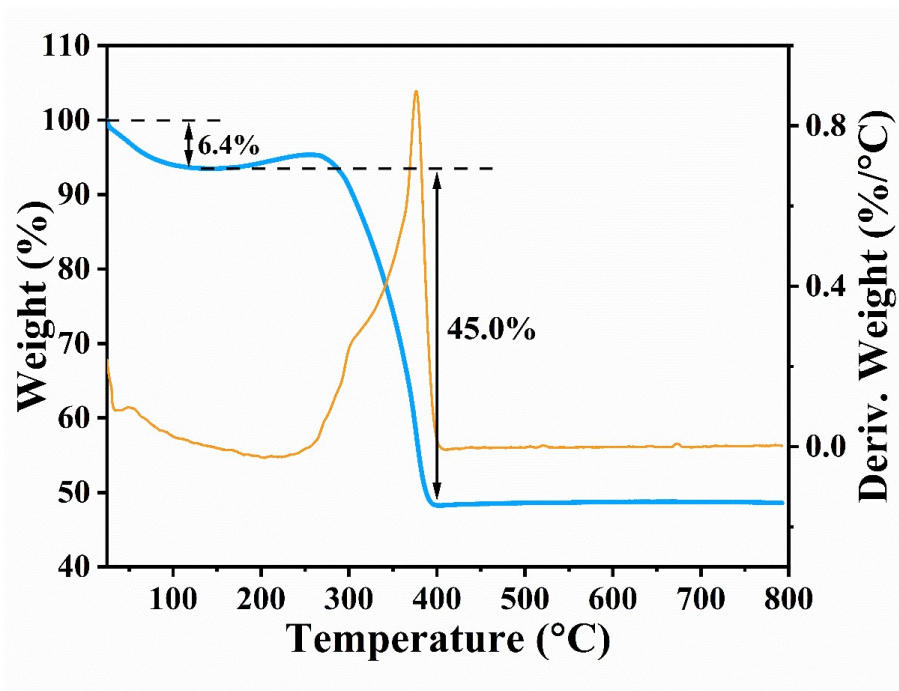

**Fig. S6.** TGA curve of VO/C in air.

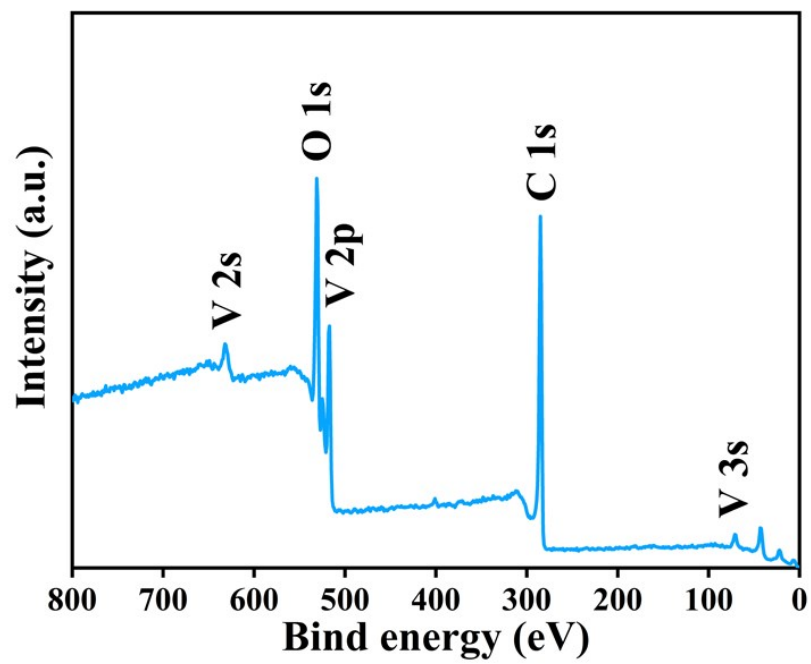

**Fig. S7.** XPS survey of the VO/C sample.

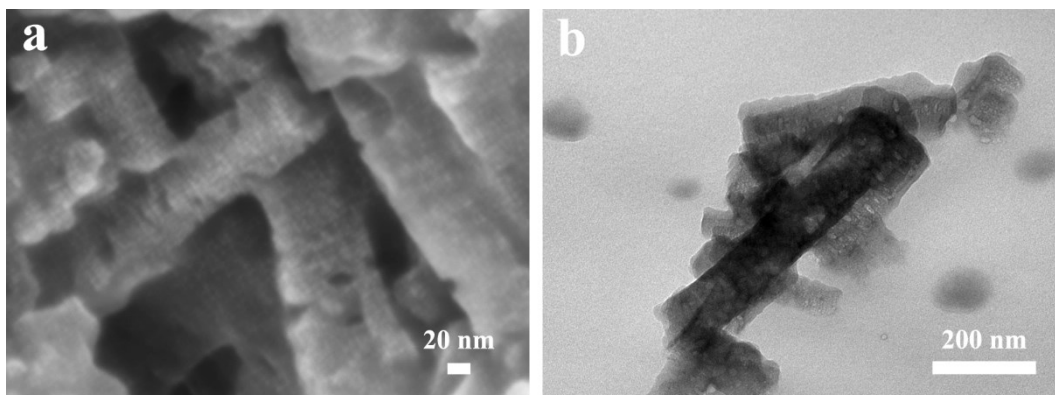

**Fig. S8.** (a) SEM and (b) TEM images of the VO/C electrode after 1000 cycles at a current density of 1 A g<sup>-1</sup>.

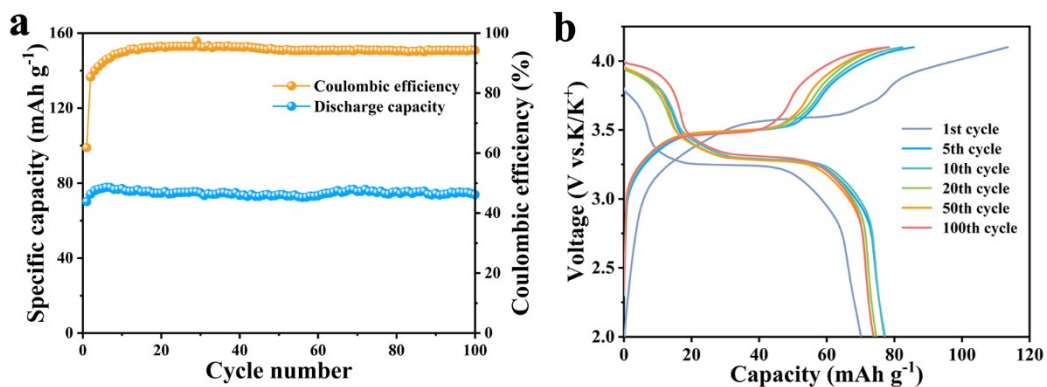

**Fig. S9.** The electrochemical performance of the KPB cathode in half-cell. (a) The cycling stability of KPB at 25 mA g<sup>-1</sup> for 100 cycles in 2.0–4.1 V and (b) the corresponding charge/discharge curves.

**Table S1.** K-storage performance comparison of the VO/C electrode with previously reported metal oxides-based anodes and some other representative anodes for PIBs.

| Anode materials                                                  | Cycling performances                 |                |                                  | Rate capability                      |                                  | Ref.             |
|------------------------------------------------------------------|--------------------------------------|----------------|----------------------------------|--------------------------------------|----------------------------------|------------------|
|                                                                  | Current density (A g <sup>-1</sup> ) | Cycling number | Capacity (mA h g <sup>-1</sup> ) | Current density (A g <sup>-1</sup> ) | Capacity (mA h g <sup>-1</sup> ) |                  |
| <b>VO/C</b>                                                      | <b>0.1</b>                           | <b>400</b>     | <b>345</b>                       | <b>1/2</b>                           | <b>244/218</b>                   | <b>This work</b> |
|                                                                  | <b>1</b>                             | <b>1000</b>    | <b>241</b>                       | <b>10/15</b>                         | <b>133/104</b>                   |                  |
| <b>Co<sub>3</sub>O<sub>4</sub>-Fe<sub>2</sub>O<sub>3</sub>/C</b> | 0.05                                 | 50             | 220                              | Not given                            |                                  | [7]              |
| <b>Pb<sub>3</sub>Nb<sub>4</sub>O<sub>13</sub> nanowires</b>      | 0.05                                 | 1100           | 74.6                             | Not given                            |                                  | [8]              |
| <b>K<sub>1.06</sub>Mn<sub>8</sub>O<sub>16</sub>/CNT</b>          | 0.1                                  | 500            | 226.5                            | 1                                    | 127.2                            | [9]              |
| <b>V<sub>2</sub>O<sub>3</sub>@PNCNFs</b>                         | 0.05                                 | 500            | ~230                             | 1                                    | 134                              | [10]             |
| <b>HS-V<sub>2</sub>O<sub>3</sub>@C</b>                           | 0.1                                  | 500            | 330                              | 5                                    | 79                               | [11]             |
| <b>SA-VO<sub>2</sub></b>                                         | 0.05                                 | 50             | 288.3                            | 2                                    | 141.4                            | [12]             |
| <b>T-Nb<sub>2</sub>O<sub>5</sub></b>                             | 0.4                                  | 400            | ~76                              | 1                                    | 74                               | [13]             |
| <b>MoO<sub>2</sub>/3DPC</b>                                      | 0.05                                 | 200            | 213                              | Not given                            |                                  | [14]             |
|                                                                  | 0.5                                  | 500            | 95                               |                                      |                                  |                  |
| <b>CuO nanoplates</b>                                            | 0.2                                  | 60             | 276.7                            | 1                                    | 206.8                            | [15]             |
|                                                                  | 1                                    | 100            | 206                              | 2                                    | 163                              |                  |
| <b>Sb<sub>2</sub>O<sub>3</sub>-RGO</b>                           | 0.1                                  | 100            | 309                              | 1                                    | 172                              | [16]             |
|                                                                  | 0.5                                  | 3300           | 201                              |                                      |                                  |                  |
| <b>TiO<sub>2</sub>-carbon heterostructure</b>                    | 0.1                                  | 200            | 197.5                            | 1                                    | 114.6                            | [17]             |
|                                                                  | 0.5                                  | 1200           | 132.8                            | 2                                    | 97.3                             |                  |
| <b>MoO<sub>2</sub>/rGO</b>                                       | 0.05                                 | 200            | 218.9                            | 0.5                                  | 176.4                            | [18]             |
|                                                                  | 0.5                                  | 500            | 104.2                            |                                      |                                  |                  |
| <b>SnO<sub>2</sub>/SSM</b>                                       | 0.05                                 | 100            | 351                              | 1                                    | 125                              | [19]             |
|                                                                  | 1                                    | 200            | 128                              |                                      |                                  |                  |
| <b>Sb<sub>2</sub>MoO<sub>6</sub>/rGO</b>                         | 0.2                                  | 50             | 381                              | 1                                    | 161                              | [20]             |
|                                                                  | 0.5                                  | 100            | 247                              |                                      |                                  |                  |
| <b>FeVO<sub>4</sub>/C</b>                                        | 0.3                                  | 2000           | 252.9                            | 1                                    | 200.6                            | [21]             |
|                                                                  |                                      |                |                                  | 2                                    | 180.3                            |                  |
| <b>K<sub>0.23</sub>V<sub>2</sub>O<sub>5</sub></b>                | 0.1                                  | 100            | 97.6                             | 0.4                                  | 92                               | [22]             |

|                                      |       |      |       |      |       |      |
|--------------------------------------|-------|------|-------|------|-------|------|
| <b>VN quantum dots</b>               | 0.1   | 100  | 228   | 1    | 187   | [23] |
|                                      | 0.5   | 500  | 215   | 2    | 152   |      |
| <b>VS<sub>2</sub></b>                | 0.1   | 60   | 410   | 2    | 100   | [24] |
| <b>VSe<sub>2</sub></b>               | 0.2   | 200  | 335   | 2    | 169   | [25] |
| <b>MoSe<sub>2</sub>/N-C</b>          | 0.1   | 300  | 258   | 1    | 195   | [26] |
|                                      |       |      |       | 2    | 178   |      |
| <b>Graphite</b>                      | 0.14  | 50   | 100   | 0.28 | 80    | [27] |
| <b>Hard carbon</b>                   | 0.028 | 100  | 216   | 1.4  | 136   | [28] |
| <b>N-doped graphene</b>              | 0.05  | 60   | 320   | 0.5  | 170   | [29] |
|                                      | 0.5   | 500  | 150   |      |       |      |
| <b>N-doped carbon nanofibers</b>     | 0.025 | 100  | 248   | 10   | 104   | [30] |
|                                      | 2     | 4000 | 146   | 20   | 101   |      |
| <b>S/N@C</b>                         | 0.1   | 400  | 200   | 2    | 91.2  | [31] |
|                                      |       |      |       | 4    | 64    |      |
| <b>S/O co-doped carbon</b>           | 0.05  | 100  | 226.6 | 1    | 158   | [32] |
|                                      | 1     | 2000 | 108.4 |      |       |      |
| <b>N/O dual-doped hard carbon</b>    | 0.05  | 100  | 230.6 | 3    | 118   | [33] |
|                                      | 1.05  | 1100 | 130   |      |       |      |
| <b>Bi</b>                            | 0.8   | 300  | 321.6 | 1.2  | 321.9 | [34] |
| <b>Bi/rGO</b>                        | 0.05  | 50   | 290   | 0.5  | 235   | [35] |
| <b>Sn<sub>4</sub>P<sub>3</sub>/C</b> | 0.05  | 50   | 307.2 | 1    | 221.9 | [36] |
| <b>FeP@C</b>                         | 0.1   | 300  | 205   | 1    | 65    | [37] |
|                                      |       |      |       | 2    | 37    |      |

**Table S2.** The fitted impedances of VO/C and C.

|                                        |                                                                                    |                       |
|----------------------------------------|------------------------------------------------------------------------------------|-----------------------|
| <p><b>Equivalent circuit model</b></p> | 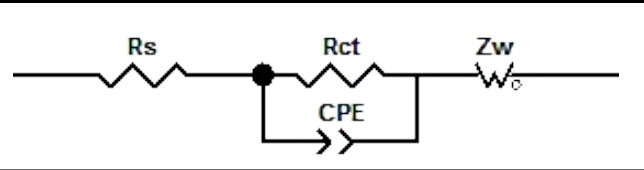 |                       |
| <p><b>Sample</b></p>                   | <p><b>Rs (Ω)</b></p>                                                               | <p><b>Rct (Ω)</b></p> |
| <p>VO/C</p>                            | <p>2.982</p>                                                                       | <p>596.9</p>          |
| <p>C</p>                               | <p>4.439</p>                                                                       | <p>1751.0</p>         |

In the equivalent circuit model,  $R_s$  represents solution resistance corresponding to the electrolyte and electrical contacts, and  $R_{ct}$  represents charge transfer resistance. As shown in Table S2, VO/C possess a much lower  $R_{ct}$  value than that of C, which demonstrates that the former has a better charge transfer kinetic. This is also consistent with the superior rate performance and cycling stability of the VO/C electrode.



## References

- [1] J. Reboul, K. Yoshida, S. Furukawa, S. Kitagawa, *CrystEngComm* 17 (2015) 323-330.
- [2] G. He, L. F. Nazar, *ACS Energy Lett.* 2 (2017) 1122-1127.
- [3] G. Kresse, J. Hafner, *Phys. Rev. B* 48 (1993) 13115-13118.
- [4] G. Kresse, D. Joubert, *Phys. Rev. B* 59 (1999) 1758-1775.
- [5] J. P. Perdew, K. Burke, M. Ernzerhof, *Phys. Rev. Lett.* 77 (1996) 3865-3868.
- [6] G. Henkelman, B. P. Uberuaga, H. Jónsson, *J. Chem. Phys.* 113 (2000) 9901-9904.
- [7] I. Sultana, M. M. Rahman, S. Mateti, V. G. Ahmadabadi, A. M. Glushenkov, Y. Chen, *Nanoscale* 9 (2017) 3646-3654.
- [8] Z. Chen, X. Cheng, H. Yu, H. Zhu, R. Zheng, T. Liu, J. Zhang, M. Shui, J. Shu, *Ceram. Int.* 44 (2018) 17094-17101.
- [9] S. Chong, Y. Wu, C. Liu, Y. Chen, S. Guo, Y. Liu, G. Cao, *Nano Energy* 54 (2018) 106-115.
- [10] T. Jin, H. Li, Y. Li, L. Jiao, J. Chen, *Nano Energy* 50 (2018) 462-467.
- [11] F. Chen, S. Wang, X.-D. He, J.-Y. Liao, Q. Hu, J.-M. Dong, C.-H. Chen, *J. Mater. Chem. A* 8 (2020) 13261-13266.
- [12] Y. Li, Q. Zhang, Y. Yuan, H. Liu, C. Yang, Z. Lin, J. Lu, *Adv. Energy Mater.* 10 (2020) 2000717.
- [13] N. Li, F. Zhang, Y. Tang, *J. Mater. Chem. A* 6 (2018) 17889-17895.
- [14] S. Bao, S.-h. Luo, S.-x. Yan, Z.-y. Wang, Q. Wang, J. Feng, Y.-l. Wang, T.-f. Yi, *Electrochim. Acta* 307 (2019) 293-301.
- [15] K. Cao, H. Liu, W. Li, Q. Han, Z. Zhang, K. Huang, Q. Jing, L. Jiao, *Small* 15 (2019) 1901775.
- [16] J. Li, N. Zhuang, J. Xie, X. Li, W. Zhuo, H. Wang, J. B. Na, X. Li, Y. Yamauchi, W. Mai, *Adv.*

Energy Mater. 10 (2020) 1903455.

- [17] Y. Li, C. Yang, F. Zheng, Q. Pan, Y. Liu, G. Wang, T. Liu, J. Hu, M. Liu, Nano Energy 59 (2019) 582-590.
- [18] C. Liu, S. Luo, H. Huang, Y. Zhai, Z. Wang, ChemSusChem 12 (2019) 873-880.
- [19] G. Suo, D. Li, L. Feng, X. Hou, Y. Yang, W. Wang, J. Electroanal. Chem. 833 (2019) 113-118.
- [20] J. Wang, B. Wang, Z. Liu, L. Fan, Q. Zhang, H. Ding, L. Wang, H. Yang, X. Yu, B. Lu, Adv. Sci. 6 (2019) 1900904.
- [21] X. Niu, Y. Zhang, L. Tan, Z. Yang, J. Yang, T. Liu, L. Zeng, Y. Zhu, L. Guo, Energy Storage Mater. 22 (2019) 160-167.
- [22] C. Liu, S. Luo, H. Huang, Z. Wang, Q. Wang, Y. Zhang, Y. Liu, Y. Zhai, Z. Wang, J. Power Sources 389 (2018) 77-83.
- [23] H. Y. Wu, Q. Y. Yu, C. Y. Lai, M. L. Qin, W. Wang, Z. W. Liu, C. Man, L. Y. Wang, B. R. Jia, X. H. Qu, Energy Storage Mater. 18 (2019) 43-50.
- [24] J. Zhou, L. Wang, M. Yang, J. Wu, F. Chen, W. Huang, N. Han, H. Ye, F. Zhao, Y. Li, Y. Li, Adv. Mater. 29 (2017) 1702061.
- [25] C. Yang, J. Feng, F. Lv, J. Zhou, C. Lin, K. Wang, Y. Zhang, Y. Yang, W. Wang, J. Li, S. Guo, Adv. Mater. 30 (2018) 1800036.
- [26] J. Ge, L. Fan, J. Wang, Q. Zhang, Z. Liu, E. Zhang, Q. Liu, X. Yu, B. Lu, Adv. Energy Mater. 8 (2018) 1801477.
- [27] Z. Jian, W. Luo, X. Ji, J. Am. Chem. Soc. 137 (2015) 11566-11569.
- [28] Z. Jian, Z. Xing, C. Bommier, Z. Li, X. Ji, Adv. Energy Mater. 6 (2016) 1501874.

- [29] Z. Ju, P. Li, G. Ma, Z. Xing, Q. Zhuang, Y. Qian, *Energy Storage Mater.* 11 (2018) 38-46.
- [30] Y. Xu, C. Zhang, M. Zhou, Q. Fu, C. Zhao, M. Wu, Y. Lei, *Nat. Commun.* 9 (2018) 1720.
- [31] A. Mahmood, S. Li, Z. Ali, H. Tabassum, B. Zhu, Z. Liang, W. Meng, W. Aftab, W. Guo, H. Zhang, M. Yousaf, S. Gao, R. Zou, Y. Zhao, *Adv. Mater.* 31 (2019) 1805430.
- [32] M. Chen, W. Wang, X. Liang, S. Gong, J. Liu, Q. Wang, S. Guo, H. Yang, *Adv. Energy Mater.* 8 (2018) 1800171.
- [33] J. Yang, Z. Ju, Y. Jiang, Z. Xing, B. Xi, J. Feng, S. Xiong, *Adv. Mater.* 30 (2018) 1700104.
- [34] K. Lei, C. Wang, L. Liu, Y. Luo, C. Mu, F. Li, J. Chen, *Angew. Chem. Int. Ed.* 57 (2018) 4687-4691.
- [35] Q. Zhang, J. Mao, W. K. Pang, T. Zheng, V. Sencadas, Y. Chen, Y. Liu, Z. Guo, *Adv. Energy Mater.* 8 (2018) 1703288.
- [36] W. Zhang, J. Mao, S. Li, Z. Chen, Z. Guo, *J. Am. Chem. Soc.* 139 (2017) 3316-3319.
- [37] F. Yang, H. Gao, J. Hao, S. Zhang, P. Li, Y. Liu, J. Chen, Z. Guo, *Adv. Funct. Mater.* 29 (2019) 1808291.
